# Supplementary material for: Association between Cesarean Section and Weight Status in Chinese Children and Adolescents: A National Survey
Source: Int J Environ Res Public Health. 2017 Dec 20;14(12):1609. doi: 10.3390/ijerph14121609 (PMC5751025; doi:10.3390/ijerph14121609)
Supplement: Supplementary file 1 [file ijerph-14-01609-s001.pdf]

# Association between Cesarean Section and Weight Status in Chinese Children and Adolescents: A National Survey

Jingjing Liang <sup>1,†</sup>, Zheqing Zhang <sup>2,†</sup>, Wenhan Yang <sup>1</sup>, Meixia Dai <sup>1</sup>, Lizi Lin <sup>1</sup>, Yajun Chen <sup>1</sup>, Jun Ma <sup>3</sup> and Jin Jing <sup>1,\*</sup>

Table S1. Lifestyle of children and adolescents by different mode of delivery.

| Lifestyle                                       | N     | Total        | Cesarean delivery | Vaginal delivery | <i>p</i> |
|-------------------------------------------------|-------|--------------|-------------------|------------------|----------|
| Dietary behavior                                |       |              |                   |                  |          |
| Fruit (servings/d) <sup>a</sup>                 | 43374 | 1.31(1.10)   | 1.36(1.13)        | 1.27(1.08)       | <0.001   |
| Vegetable (servings/d) <sup>a</sup>             | 43432 | 1.83(1.46)   | 1.88(1.48)        | 1.81(1.44)       | <0.001   |
| Sugar-sweetened beverages (cups/d) <sup>b</sup> | 42584 | 0.40(0.74)   | 0.36(0.68)        | 0.42(0.78)       | <0.001   |
| Meat (servings/d) <sup>c</sup>                  | 43291 | 1.18(1.22)   | 1.23(1.25)        | 1.15(1.20)       | <0.001   |
| breakfast (day/week)                            | 43907 | 6.49(1.42)   | 6.59(1.29)        | 6.42(1.50)       | <0.001   |
| snacks (day/week)                               | 43578 | 2.01(1.95)   | 1.93(1.90)        | 2.06(1.99)       | <0.001   |
| Sedentary behavior (minute/d)                   |       |              |                   |                  |          |
| Sitting and lying                               | 39609 | 336.7(221.3) | 332.8(216.9)      | 339.4(224.4)     | 0.004    |
| Doing homework                                  | 42716 | 116.2(73.4)  | 112.2(72.2)       | 119.1(74.0)      | <0.001   |
| Watching television                             | 41431 | 55.4(62.7)   | 52.2(57.3)        | 57.6(66.2)       | <0.001   |
| Using computer                                  | 39525 | 41.8(66.2)   | 37.3(61.3)        | 44.9(69.3)       | <0.001   |
| Physical activity (minute/d)                    |       |              |                   |                  |          |
| Vigorous intensity physical activity            | 41274 | 28.7(44.7)   | 27.9(42.8)        | 29.3(46.0)       | 0.002    |
| Moderate intensity physical activity            | 40882 | 28.4(44.2)   | 27.3(42.4)        | 29.3(45.4)       | <0.001   |
| Walking                                         | 41167 | 45.7(67.02)  | 43.2(64.4)        | 47.5(68.7)       | <0.001   |

<sup>a</sup>: A serving of fruit or vegetable is equivalent to 100 g ; <sup>b</sup>: A cup is equivalent to 250 mL; <sup>c</sup>: A serving of meat products is equivalent to 75 g

**Table S2.** Crude and multivariable adjusted risk ratios for obesity in offspring associated with cesarean vs. vaginal delivery\*

| Group                         | Overweight (RR (95%CI)) |        |                   |        | Obesity (RR (95%CI)) |        |                   |        |
|-------------------------------|-------------------------|--------|-------------------|--------|----------------------|--------|-------------------|--------|
|                               | Crude                   | P      | Adjusted          | P      | Crude                | P      | Adjusted          | P      |
| Total                         | 1.30 (1.23, 1.38)       | <0.001 | 1.20 (1.13, 1.28) | <0.001 | 1.56 (1.49, 1.64)    | <0.001 | 1.37 (1.30, 1.45) | <0.001 |
| Stratified analysis by sex    |                         |        |                   |        |                      |        |                   |        |
| Boys                          | 1.22 (1.13, 1.32)       | <0.001 | 1.13 (1.04, 1.24) | 0.004  | 1.46 (1.38, 1.54)    | <0.001 | 1.31 (1.23, 1.39) | <0.001 |
| Girls                         | 1.39 (1.28, 1.51)       | <0.001 | 1.29 (1.18, 1.42) | <0.001 | 1.65 (1.51, 1.79)    | <0.001 | 1.54 (1.40, 1.69) | <0.001 |
| Stratified analysis by age    |                         |        |                   |        |                      |        |                   |        |
| Children                      | 1.20 (1.12, 1.28)       | <0.001 | 1.17 (1.09, 1.26) | <0.001 | 1.46 (1.38, 1.54)    | <0.001 | 1.31 (1.23, 1.39) | <0.001 |
| Adolescents                   | 1.40 (1.25, 1.56)       | <0.001 | 1.29 (1.14, 1.47) | <0.001 | 1.65 (1.51, 1.79)    | <0.001 | 1.54 (1.40, 1.69) | <0.001 |
| Stratified analysis by region |                         |        |                   |        |                      |        |                   |        |
| Urban                         | 1.36 (1.27, 1.46)       | <0.001 | 1.23 (1.13, 1.33) | <0.001 | 1.69 (1.59, 1.79)    | <0.001 | 1.42 (1.33, 1.52) | <0.001 |
| Rural                         | 1.23 (1.12, 1.35)       | <0.001 | 1.16 (1.05, 1.28) | 0.005  | 1.39 (1.28, 1.50)    | <0.001 | 1.28 (1.17, 1.39) | <0.001 |

\* Overweight and obesity are defined according to the “BMI percentile” cutoff values proposed by the WHO. P values refer to Wald’s test. Analyses were adjusted for birth weight, gestational age, maternal age at childbirth, maternal education level, paternal education level, region, sex, and year of birth. The sex-subgroup analysis was adjusted for all covariates except for sex; the area-subgroup analysis was adjusted for all covariates except for area.

**Table S3.** Differences of BMI z-scores between cesarean and vaginal delivery (means  $\pm$  SE)

| Group                         | Cesarean delivery | Vaginal delivery   | P-crude | Cesarean delivery | Vaginal delivery   | P-adjusted |
|-------------------------------|-------------------|--------------------|---------|-------------------|--------------------|------------|
| Total                         | 0.411 $\pm$ 0.009 | 0.118 $\pm$ 0.008  | <0.001  | 0.384 $\pm$ 0.010 | 0.157 $\pm$ 0.009  | <0.001     |
| Stratified analysis by sex    |                   |                    |         |                   |                    |            |
| Boys                          | 0.630 $\pm$ 0.014 | 0.293 $\pm$ 0.012  | <0.001  | 0.598 $\pm$ 0.015 | 0.352 $\pm$ 0.013  | <0.001     |
| Girls                         | 0.168 $\pm$ 0.012 | -0.053 $\pm$ 0.010 | <0.001  | 0.169 $\pm$ 0.013 | -0.039 $\pm$ 0.011 | <0.001     |
| Stratified analysis by age    |                   |                    |         |                   |                    |            |
| Children                      | 0.467 $\pm$ 0.011 | 0.223 $\pm$ 0.010  | <0.001  | 0.456 $\pm$ 0.012 | 0.232 $\pm$ 0.011  | <0.001     |
| Adolescents                   | 0.232 $\pm$ 0.018 | -0.038 $\pm$ 0.011 | <0.001  | 0.227 $\pm$ 0.020 | -0.002 $\pm$ 0.013 | <0.001     |
| Stratified analysis by region |                   |                    |         |                   |                    |            |
| Urban                         | 0.412 $\pm$ 0.011 | 0.077 $\pm$ 0.010  | <0.001  | 0.383 $\pm$ 0.012 | 0.134 $\pm$ 0.011  | <0.001     |
| Rural                         | 0.409 $\pm$ 0.017 | 0.172 $\pm$ 0.012  | <0.001  | 0.375 $\pm$ 0.018 | 0.193 $\pm$ 0.013  | <0.001     |

P values refer to ANCOVA test. Analyses were adjusted for birth weight, gestational age, maternal age at childbirth, maternal education level, paternal education level, region, sex, and year of birth. The sex-subgroup analysis was adjusted for all covariates except for sex; the area-subgroup analysis was adjusted for all covariates except for area.

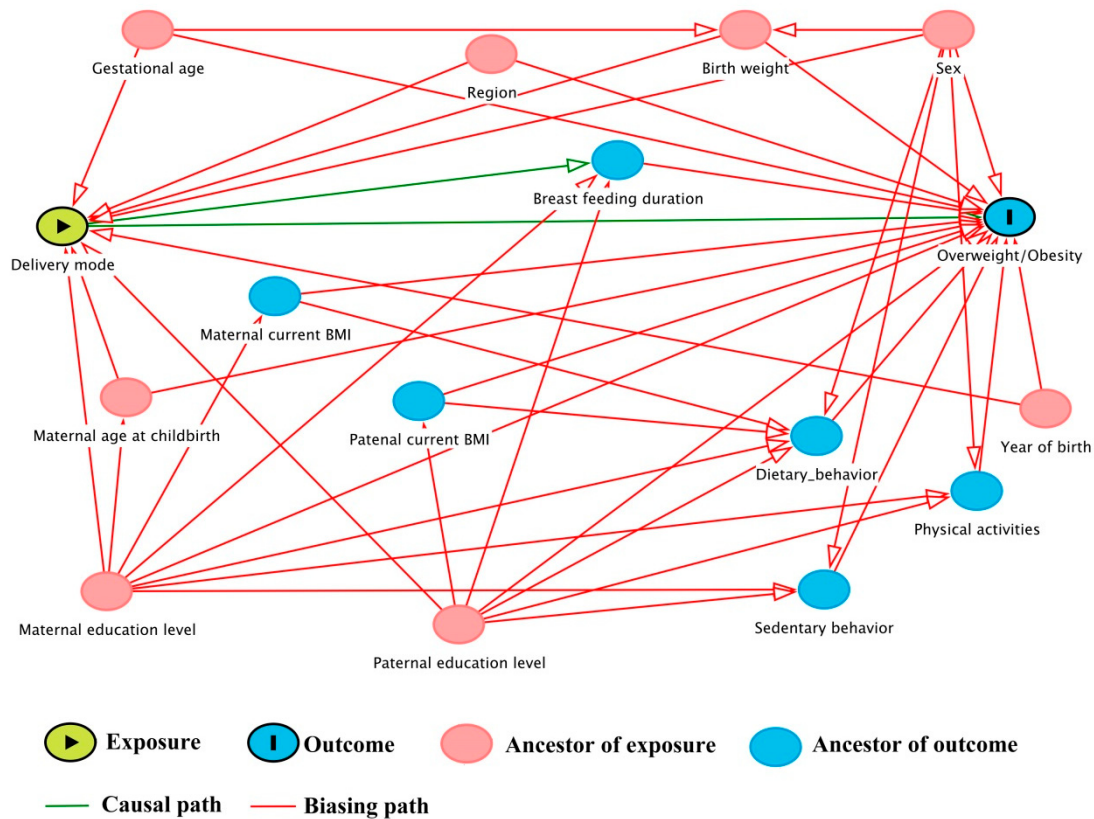

**Figure S1.** Directed acyclic graph (DAG) illustrating relationship of delivery mode and overweight/obesity and confounders
